# Supplementary material
Source: MDPI journal article supplement (https://www.mdpi.com/2076-3417/14/7/2676)
Supplement: s1 [file s1]

# The Antifungal Effect of *Weissella confusa* WIKIM51 (Wilac D001) on Vaginal Epithelial Cells Infected by *Candida albicans*

## Supplementary Information

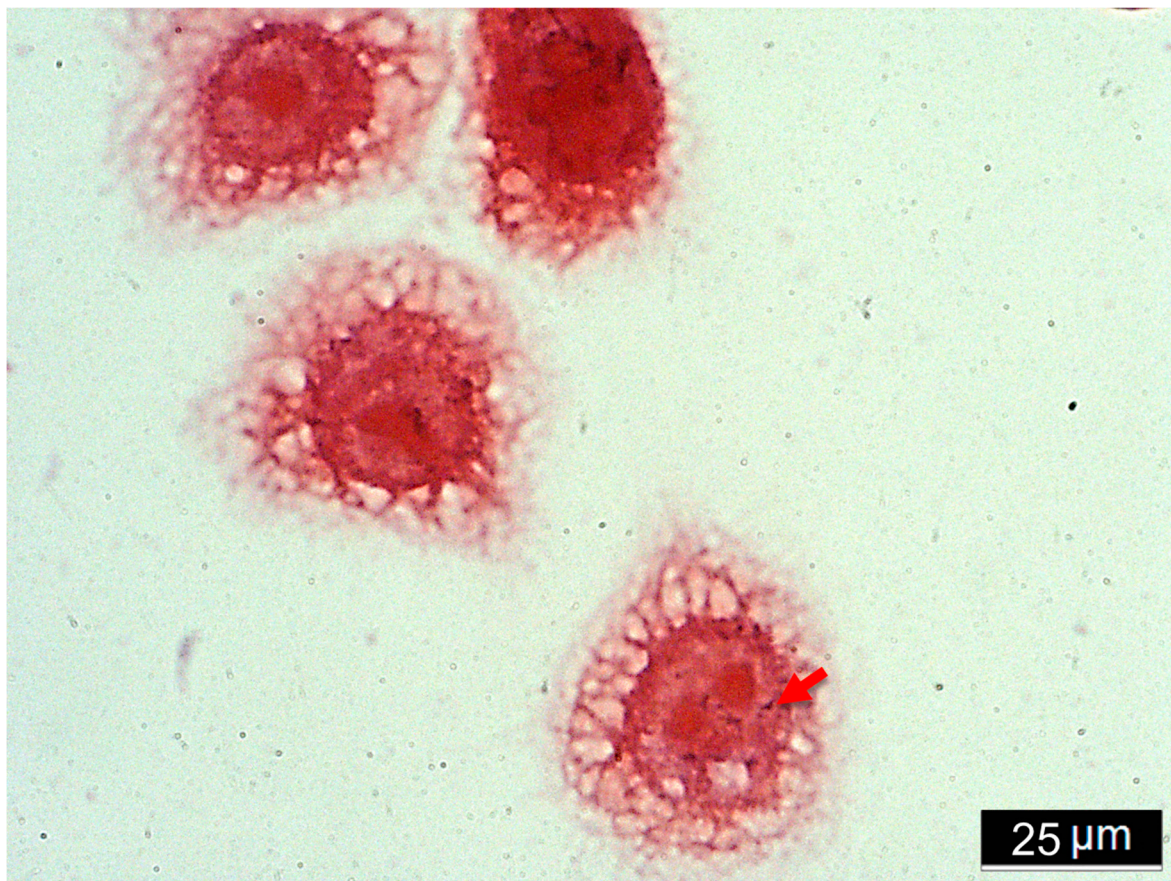

**Supplementary Figure S1. Gram staining of adherent VECs Wilac D001 under microscopy.**

VECs were surrounded by *W. confusa* after 1 h of incubation. Red arrow indicates Wilac D001. Scale bar = 25μm. Magnification, x1,000.

**Supplementary Table S1. Culture conditions of microorganism.**

| Microorganism                  |          | Storage Conditions |            |      |              |       |
|--------------------------------|----------|--------------------|------------|------|--------------|-------|
| Strain                         | Organism | Medium             | Atmosphere | Temp | Medium       | Temp  |
| <i>Weissella confusa</i>       | Bacteria | MRS                | Aerobic    | 37°C | 40% glycerol | -80°C |
| <i>Lactobacillus reuteri</i>   | Bacteria | MRS                | Aerobic;   | 37°C | 40% glycerol | -80°C |
| <i>Lactobacillus rhamnosus</i> | Bacteria | MRS                | Aerobic;   | 37°C | 40% glycerol | -80°C |
| <i>Candida albicans</i>        | Yeast    | YM                 | Anerobic   | 26°C | 30% glycerol | -80°C |

Every strain followed the recommended medium and protocol. After confirming the standard curves to count colony-forming units under OD 600nm, they were kept at -80°C before use in each experiment. For the experiments, *C. albicans* were cultured in YM broth media for 24 h at 26 °C in a shaking incubator at 100 rpm. The stock culture of bacteria strains, including *W. confusa*, *L. reuteri*, and *L. rhamnosus*, was activated in MRS broth media for 24 h at 37 °C in a shaking incubator at 100 rpm.
